# Supplementary material
Source: PubMed Central journal article supplement (PMC3719882)
Supplement: NIHMS465317-supplement-Chen_Cell_Review_Supp_Table.pdf [file NIHMS465317-supplement-Chen_Cell_Review_Supp_Table.pdf]

**Table S1. Summary of Mouse Models of Glioma**

| Genetics                                                                                         | Techniques                          | Tumor type    | Grade  | Incidences          |
|--------------------------------------------------------------------------------------------------|-------------------------------------|---------------|--------|---------------------|
| NF1 <sup>+/-</sup> ;P53 <sup>+/-</sup> (Reilly et al., 2000)                                     | gKO                                 | AST           | II-IV  | 30-75% by 15-55 wks |
| ARF <sup>-/-</sup> (Kamijo et al., 1997)                                                         | gKO                                 | AST           | NA     | 9% by 18-20 wks     |
| P53 <sup>fl/fl</sup> (Wang et al., 2009)                                                         | cKO (GFAP-Cre)                      | AST/MED (13%) | NA     | 88% by 24-52 wks    |
| NF1 <sup>fl/+</sup> ;p53 <sup>+/-</sup> (Zhu et al., 2005)                                       | gKO,cKO (GFAP-Cre)                  | AST           | II-IV  | 100% by 14-40 wks   |
| NF1 <sup>fl/+</sup> ;p53 <sup>-fl</sup> (Zhu et al., 2005)                                       | gKO,cKO (GFAP-Cre)                  | AST           | II-IV  | 100% by 14-40 wks   |
| NF1 <sup>fl/+</sup> ;p53 <sup>+/-</sup> ;Pten <sup>fl/+</sup> (Kwon et al., 2008)                | gKO,cKO (GFAP-Cre)                  | AST           | III-IV | 100% by 12-24 wks   |
| NF1 <sup>fl/+</sup> ;p53 <sup>-fl</sup> ;Pten <sup>fl/+</sup> (Kwon et al., 2008)                | gKO,cKO (GFAP-Cre)                  | AST           | III-IV | 100% by 11-24 wks   |
| NF1 <sup>fl/+</sup> ;p53 <sup>fl/fl</sup> ;Pten <sup>fl/+</sup> (Unpublished observation)        | cKO (GFAP-Cre)                      | AST           | III-IV | 100% by 11-24 wks   |
| NF1 <sup>fl/+</sup> ;p53 <sup>fl/fl</sup> ;Pten <sup>fl/+</sup> (Alcantara Llaguno et al., 2009) | cKO (Nes-CreERT2, E13.5 induce)     | AST           | III-IV | 100% by 11-24 wks   |
| NF1 <sup>fl/+</sup> ;p53 <sup>fl/fl</sup> ;Pten <sup>fl/+</sup> (Alcantara Llaguno et al., 2009) | cKO (Nes-CreERT2, induced at 4 wks) | AST           | III-IV | 100% by 28-56 wks   |
| P53 <sup>fl/fl</sup> ;Pten <sup>fl/+</sup> (Zheng et al., 2008)                                  | cKO (GFAP-Cre)                      | AST           | III-IV | 73% by 15-40 wks    |
| GFAPZT121 (Xiao et al., 2002)                                                                    | TG (bActin-Cre)                     | AST           | II-III | 100% by 25 wks      |
| GFAPZT121;Pten <sup>fl/+</sup> (Xiao et al., 2002)                                               | TG, cKO (bActin-Cre)                | AST           | II-III | 100% by 11 wks      |
| GFAPZT121;Pten <sup>fl/fl</sup> (Xiao et                                                         | TG; cKO; MSCV-Cre                   | AST           | NA     | 100%                |

|                                                           |                       |               |               |                     |
|-----------------------------------------------------------|-----------------------|---------------|---------------|---------------------|
| al., 2005)                                                | virus                 |               |               |                     |
| GFAP-HRasV12 (Ding et al., 2001)                          | TG                    | AST           | II-IV         | 20-100% by 2-24 wks |
| GFAP-HRasV12;GFAP-EGF RvIII (Ding et al., 2003)           | TG                    | OLIG/MIXED    | III           | 100% by 2-13 wks    |
| GFAP-HRasV12;Ad-EGFRvII I (Wei et al., 2006)              | TG; virus             | AST/MIXED     | II-IV         | 95% by 12 wks       |
| GFAP-HRasV12;Pten <sup>fl/+</sup> (Wei et al., 2006)      | TG; cKO, Ad-Cre virus | AST           | III-IV        | 73% by 8 wks        |
| S100-v-erbB (Weiss et al., 2003)                          | TG                    | OLIG          | II            | 60% by 52 wk        |
| S100-v-erbB;INK4aARF <sup>-/-</sup> (Weiss et al., 2003)  | TG; cKO               | OLIG          | III           | 90% by 24 wks       |
| S100-v-erbB;p53 <sup>+/-</sup> (Weiss et al., 2003)       | TG, gKO               | OLIG          | III           | 80% by 24 wks       |
| PDGF-B (Uhrbom et al., 1998)                              | MoMuL virus           | AST/OLIG/PNET | NA            | 40% in 14-29 wks    |
| PDGF-A (Jackson et al., 2006)                             | Infusion              | NA            | NA            | 100% in 6 days      |
| PDGF-B;Ntv-a (Dai et al., 2001)                           | TG; RCAS virus        | OLIG          | Mainly II     | 60% by 12 wks       |
| PDGF-B;Gtv-a (Dai et al., 2001)                           | TG; RCAS virus        | OLIG          | Mainly II     | 39% by 12 wks       |
| PDGF-B;P53 <sup>-/-</sup> ;Ntv-a (Dai et al., 2001)       | gKO, TG; RCAS virus   | GBM           | IV            | 100% by 8 wks       |
| GFAP-PDGFB;P53 <sup>-/-</sup> (Dai et al., 2001)          | TG gKO                | GBM/OLIG      | III-IV        | 43-68% by 24 wks    |
| PDGF-B;INK4a/ARF <sup>-/-</sup> ;Ntv-a (Dai et al., 2001) | gKO, TG; RCAS virus   | OLIG/MIXED/   | Mainly III-IV | 57% by 12 wks       |

|                                                                                         |                                   | GBM                |                  |                               |
|-----------------------------------------------------------------------------------------|-----------------------------------|--------------------|------------------|-------------------------------|
| PDGF-B;INK4a/ARF <sup>-/-</sup> ;Gtv-a<br>(Dai et al., 2001)                            | gKO, TG; RCAS virus               | OLIG/MIXED/<br>GBM | Mainly<br>III-IV | 70% by 12<br>wks              |
| EGFRvIII;INK4a/ARF <sup>-/-</sup> ;NTV<br>-a (Holland et al., 1998)                     | gKO, TG; RCAS virus               | NA                 | NA               | 42% by<br>8-10 wks            |
| EGFRvIII;INK4a/ARF <sup>+/-</sup> ;NTV<br>-a (Holland et al., 1998)                     | gKO, TG; RCAS virus               | NA                 | NA               | 52% by<br>8-10 wks            |
| KRas;Akt;Ntv-a (Holland et<br>al., 2000)                                                | TG; RCAS virus                    | AST                | IV               | 26% by 9<br>wks               |
| KRas;Akt;INK4a/ARF <sup>-/-</sup> ;Ntv-a<br>(Uhrbom et al., 2002)                       | gKO, TG; RCAS virus               | AST                | Mainly<br>IV     | 49% by 12<br>wks              |
| KRas;Akt;INK4a/ARF <sup>-/-</sup> ;Gtv-a<br>(Uhrbom et al., 2002)                       | gKO, TG; RCAS virus               | AST                | Mainly<br>IV     | 42% by 12<br>wks              |
| HRasV12;AKT (Marumoto et<br>al., 2009)                                                  | TG (GFAP-Cre);<br>Lentivirus      | AST                | III-IV           | 42% by<br>16-20 wks           |
| HRasV12;AKT;p53 <sup>+/-</sup><br>(Marumoto et al., 2009)                               | gKO, TG (GFAP-Cre);<br>Lentivirus | AST                | Mainly<br>IV     | 100% by<br>22 wks             |
| EGFRvIII/vIII;INK4a/ARF <sup>-/-</sup> ;<br>Pten <sup>fl/fl</sup> (Zhu et al., 2009)    | TG; cKO, gKO,<br>Ad-Cre virus     | GBM                | IV               | 100% by<br>10 wks             |
| EGFRvIII/wt;INK4a/ARF <sup>-/-</sup> ;Pt<br>en <sup>fl/fl</sup> (Zhu et al., 2009)      | TG; cKO, gKO,<br>Ad-Cre virus     | GBM                | IV               | 100% by<br>13 wks             |
| P53 <sup>fl/fl</sup> ;Pten <sup>fl/fl</sup> (Chow et al.,<br>2011)                      | TG;cKO,GFAP-CreER<br>TM           | AST                | III-IV           | 100% by<br>~52 wks            |
| P53 <sup>fl/fl</sup> ;Pten <sup>fl/fl</sup> ;Rb <sup>fl/fl</sup> (Chow et al.,<br>2011) | TG;cKO,GFAP-CreER<br>TM           | AST                | III-IV           | 100% by<br>~30 wks            |
| NF <sup>fl/-</sup> or NF1 <sup>fl/fl</sup> (Bajenaru et al.,<br>2003; Zhu et al., 2005) | TG (GFAP-cre)                     | AST                | I                | 100% or<br>62% by ~<br>40 wks |

gKO: germline knockout; cKO: conditional knockout; TG: transgenic animal; Ad-Cre: Cre expressing adenovirus

OLIG: oligodendroglioma; AST: astrocytoma; GBM: glioblastoma; MED: medulloblastoma; MIXED: oligodendroastrocytoma

#### References:

- Alcantara Llaguno, S., Chen, J., Kwon, C.H., Jackson, E.L., Li, Y., Burns, D.K., Alvarez-Buylla, A., and Parada, L.F. (2009). Malignant astrocytomas originate from neural stem/progenitor cells in a somatic tumor suppressor mouse model. *Cancer cell* *15*, 45-56.
- Bajenaru, M.L., Hernandez, M.R., Perry, A., Zhu, Y., Parada, L.F., Garbow, J.R., and Gutmann, D.H. (2003). Optic nerve glioma in mice requires astrocyte Nf1 gene inactivation and Nf1 brain heterozygosity. *Cancer Res* *63*, 8573-8577.
- Chow, L.M., Endersby, R., Zhu, X., Rankin, S., Qu, C., Zhang, J., Broniscer, A., Ellison, D.W., and Baker, S.J. (2011). Cooperativity within and among Pten, p53, and Rb pathways induces high-grade astrocytoma in adult brain. *Cancer cell* *19*, 305-316.
- Dai, C., Celestino, J.C., Okada, Y., Louis, D.N., Fuller, G.N., and Holland, E.C. (2001). PDGF autocrine stimulation dedifferentiates cultured astrocytes and induces oligodendrogliomas and oligoastrocytomas from neural progenitors and astrocytes in vivo. *Genes Dev* *15*, 1913-1925.
- Ding, H., Roncari, L., Shannon, P., Wu, X., Lau, N., Karaskova, J., Gutmann, D.H., Squire, J.A., Nagy, A., and Guha, A. (2001). Astrocyte-specific expression of activated p21-ras results in malignant astrocytoma formation in a transgenic mouse model of human gliomas. *Cancer Res* *61*, 3826-3836.
- Ding, H., Shannon, P., Lau, N., Wu, X., Roncari, L., Baldwin, R.L., Takebayashi, H., Nagy, A., Gutmann, D.H., and Guha, A. (2003). Oligodendrogliomas result from the expression of an activated mutant epidermal growth factor receptor in a RAS transgenic mouse astrocytoma model. *Cancer Res* *63*, 1106-1113.
- Holland, E.C., Celestino, J., Dai, C., Schaefer, L., Sawaya, R.E., and Fuller, G.N. (2000). Combined activation of Ras and Akt in neural progenitors induces glioblastoma formation in mice. *Nature genetics* *25*, 55-57.
- Holland, E.C., Hively, W.P., DePinho, R.A., and Varmus, H.E. (1998). A constitutively active epidermal growth factor receptor cooperates with disruption of G1 cell-cycle arrest pathways to induce glioma-like lesions in mice. *Genes Dev* *12*, 3675-3685.
- Jackson, E.L., Garcia-Verdugo, J.M., Gil-Perotin, S., Roy, M., Quinones-Hinojosa, A., Vandenberg, S., and Alvarez-Buylla, A. (2006). PDGFR alpha-positive B cells are neural stem cells in the adult SVZ that form glioma-like growths in response to increased PDGF signaling. *Neuron* *51*, 187-199.
- Kamijo, T., Zindy, F., Roussel, M.F., Quelle, D.E., Downing, J.R., Ashmun, R.A., Grosveld, G., and Sherr, C.J. (1997). Tumor suppression at the mouse INK4a locus mediated by the alternative reading frame product p19ARF. *Cell* *91*, 649-659.
- Kwon, C.H., Zhao, D., Chen, J., Alcantara, S., Li, Y., Burns, D.K., Mason, R.P., Lee, E.Y., Wu, H., and Parada, L.F. (2008). Pten Haploinsufficiency Accelerates Formation of High Grade Astrocytomas *Cancer Res* *68*, 1-9.

Marumoto, T., Tashiro, A., Friedmann-Morvinski, D., Scadeng, M., Soda, Y., Gage, F.H., and Verma, I.M. (2009). Development of a novel mouse glioma model using lentiviral vectors. *Nature medicine* *15*, 110-116.

Reilly, K.M., Loisel, D.A., Bronson, R.T., McLaughlin, M.E., and Jacks, T. (2000). Nf1;Trp53 mutant mice develop glioblastoma with evidence of strain-specific effects. *Nature genetics* *26*, 109-113.

Uhrbom, L., Dai, C., Celestino, J.C., Rosenblum, M.K., Fuller, G.N., and Holland, E.C. (2002). Ink4a-Arf loss cooperates with KRas activation in astrocytes and neural progenitors to generate glioblastomas of various morphologies depending on activated Akt. *Cancer Res* *62*, 5551-5558.

Uhrbom, L., Hesselager, G., Nister, M., and Westermarck, B. (1998). Induction of brain tumors in mice using a recombinant platelet-derived growth factor B-chain retrovirus. *Cancer Res* *58*, 5275-5279.

Wang, Y., Yang, J., Zheng, H., Tomasek, G.J., Zhang, P., McKeever, P.E., Lee, E.Y., and Zhu, Y. (2009). Expression of mutant p53 proteins implicates a lineage relationship between neural stem cells and malignant astrocytic glioma in a murine model. *Cancer cell* *15*, 514-526.

Wei, Q., Clarke, L., Scheidenhelm, D.K., Qian, B., Tong, A., Sabha, N., Karim, Z., Bock, N.A., Reti, R., Swoboda, R., *et al.* (2006). High-grade glioma formation results from postnatal pten loss or mutant epidermal growth factor receptor expression in a transgenic mouse glioma model. *Cancer Res* *66*, 7429-7437.

Weiss, W.A., Burns, M.J., Hackett, C., Aldape, K., Hill, J.R., Kuriyama, H., Kuriyama, N., Milshteyn, N., Roberts, T., Wendland, M.F., *et al.* (2003). Genetic determinants of malignancy in a mouse model for oligodendroglioma. *Cancer Res* *63*, 1589-1595.

Xiao, A., Wu, H., Pandolfi, P.P., Louis, D.N., and Van Dyke, T. (2002). Astrocyte inactivation of the pRb pathway predisposes mice to malignant astrocytoma development that is accelerated by PTEN mutation. *Cancer cell* *1*, 157-168.

Xiao, A., Yin, C.Y., Yang, C.Y., Di Cristofano, A., Pandolfi, P.P., and Van Dyke, T. (2005). Somatic induction of Pten loss in a preclinical astrocytoma model reveals major roles in disease progression and avenues for target discovery and validation. *Cancer research* *65*, 5172-5180.

Zheng, H., Ying, H., Yan, H., Kimmelman, A.C., Hiller, D.J., Chen, A.J., Perry, S.R., Tonon, G., Chu, G.C., Ding, Z., *et al.* (2008). p53 and Pten control neural and glioma stem/progenitor cell renewal and differentiation. *Nature* *455*, 1129-1133.

Zhu, H., Acquaviva, J., Ramachandran, P., Boskovitz, A., Woolfenden, S., Pfannl, R., Bronson, R.T., Chen, J.W., Weissleder, R., Housman, D.E., *et al.* (2009). Oncogenic EGFR signaling cooperates with loss of tumor suppressor gene functions in gliomagenesis. *Proceedings of the National Academy of Sciences of the United States of America* *106*, 2712-2716.

Zhu, Y., Guignard, F., Zhao, D., Liu, L., Burns, D.K., Mason, R.P., Messing, A., and Parada, L.F. (2005). Early inactivation of p53 tumor suppressor gene cooperating with NF1 loss induces malignant astrocytoma. *Cancer cell* *8*, 119-130.
